# Supplementary material for: Regulation effects of Co2+ on the construction of a Cu–Ni(OH)2@CoO nanoflower cluster heterojunction: a critical factor in obtaining a high-performance battery-type hybrid supercapacitor
Source: Royal Society of Chemistry journal article supplement (doi:10.1039/d1nr04668c), 2021-01-01
Supplement: d1nr04668c1.pdf [file d1nr04668c1.pdf]

# Supporting Information

## **Regulation Effects of $\text{Co}^{2+}$ in Constructing of Cu- $\text{Ni}(\text{OH})_2@\text{CoO}$ Nanoflower Clusters Heterojunction: A Critical Factor of Obtaining High-Performance Battery-type Hybrid Supercapacitor**

**Huifang Yang,<sup>a</sup> Haoran Guo,<sup>a</sup> Xinpan Li,<sup>b</sup> Wenlu Ren,<sup>a</sup> and Rui Song<sup>\*a</sup>**

<sup>a</sup>School of Chemical Sciences, University of Chinese Academy of Sciences, 19 Yuquan Road, Shijingshan District, Beijing, 100049, PR China

<sup>b</sup>Institute of Chemistry, Chinese Academy of Sciences (CAS), 2 Zhongguancun North Road, Haidian District, Beijing, 100190, PR China

E-mail: [rsong@ucas.ac.cn](mailto:rsong@ucas.ac.cn)

## Experimental section

**Pre-treatment of Ni-foam:** First, several nickel foams ( $3\text{ cm} \times 4\text{ cm}$ ) were put in 6 M HCl solutions for 10 min to eliminate the surface oxides. Then, they were transferred into 20 mL acetone for 10 min to experience a process of degreasing. Finally, after 30 min ultrasonic cleaning and washing by deionized water, the nickel foams was taken to an oven with  $60\text{ }^{\circ}\text{C}$  for 1 h.

**Preparation of Cu-Ni(OH)<sub>2</sub>@CoO NFCs electrodes:** The Cu-Ni(OH)<sub>2</sub>@CoO NFCs composite is synthesized by a two-step hydrothermal method. In the first hydrothermal process, 0.3 g cupric sulfate ( $\text{CuSO}_4 \cdot 5\text{H}_2\text{O}$ ) and 2 g urea were added into 30 mL deionized water under stirring to form a homogeneous and transparent solution. The precursors were made by immersing nickel foams in aqueous solution and transferred to a Teflon-lined stainless steel autoclave, then kept at  $120\text{ }^{\circ}\text{C}$  for 6 h. In the second steps, after washed by deionized water several times, the obtained electrode material is transferred to a Teflon-lined stainless steel autoclave which contains 30 ml of cobaltous nitrate hexahydrate ( $\text{Co}(\text{NO}_3)_2 \cdot 6\text{H}_2\text{O}$ , 0.3g) aqueous solution, then kept at  $100\text{ }^{\circ}\text{C}$  for 6 h. Ultimately, the synthesized sample was washed by deionized water several times and then transferred into an oven maintained at  $60\text{ }^{\circ}\text{C}$  overnight.

**Assembly of flexible all-solid Hybrid Asymmetric Supercapacitors:** 6 g polyvinyl alcohol (PVA) and 3 g KOH were added into 60 mL deionized water to prepare gel electrolytes for HASC. First, the above solution is heated to  $100\text{ }^{\circ}\text{C}$  for 30 min to obtain a homogeneous solution, then the positive electrode materials (Cu-

Ni(OH)<sub>2</sub>@CoO NFCs, 1 cm<sup>2</sup>) and negative electrode materials (porous carbon coated nickel foam, 1 cm<sup>2</sup>) were immersed into the PVA/KOH electrolytes for 1 min. After repeated soaking for three times, the electrodes were transferred to a petri dish and stand for 12 h before being assembled into a flexible all-solid HASC. And the specific assembly procedures of flexible all-solid HASC could be found in our previous work.

1

## Characterization methods

A Rigaku Smartlab X-ray diffraction (XRD) equipment was applied to collect the diffraction data of the obtained samples using Cu K $\alpha$  ( $\lambda = 0.1544$  nm) radiation. Moreover, a Renishaw Invia Raman spectrometer with a 20 mW Ar<sup>+</sup> laser source of 532 nm was used to collect the Raman spectra. The morphologies and structures of samples were investigated by a field emission scanning electron microscope (FESEM) (Regulus 8220). In addition, a transmission electron microscopy (TEM, Tecnai F30, S-TWIN) coupled with an energy-dispersive X-ray spectroscopy (EDS) were conducted to detect the microstructure of active materials. The X-ray photoelectron spectra (XPS) were also measured on a Thermo Scientific ECSALab 250Xi X-ray photoelectron spectrometer with an Al K $\alpha$  X-ray radiation (1486 eV) to investigate the chemical states and surface composition.

## Electrochemical measurements

**Evaluation of Supercapacitive Performances:** All electrochemical tests were based on a CHI 660E electrochemical workstation (CH Instrumental Co, Ltd, Shanghai), and the electrochemical property of individual electrode is studied by a three-electrode electrochemical set-up (Pt foil as the counter electrode, saturated calomel electrode (SCE) as the reference electrode and the self-supported Cu-Ni(OH)<sub>2</sub>@CoO NFCs as the working electrode, respectively). In this system, an aqueous solution of 3 M KOH was used as electrolyte, and the stability of electrode

was tested under the scan rate of 50 mV s<sup>-1</sup>. Besides, the range of frequency in the electrochemical impedance spectroscopy (EIS) measurement is from 0.01 HZ to 100 KHz. Meanwhile, the galvanostatic charge-discharge (GCD) tests were carried out from -0.1 V to 0.4 V and the areal specific capacitance ( $C_s$ ) were calculated by the equation as follows:

$$C_s = It / A\Delta V \quad (1)$$

Where  $C_s$  is the areal specific capacitance (mF·cm<sup>-2</sup>),  $I$  is the discharge current (A),  $t$  is the discharge time (s),  $A$  represents the area of self-supported electrodes (cm<sup>2</sup>) and  $\Delta V$  is the potential window (V).

Besides, the energy density and power density of Ni(OH)<sub>2</sub>@CoO NFCs//porous carbon HASC are calculated by the two equations as follows:

$$E = \frac{1}{2} C_s V^2 \quad (2)$$

$$P = E/t \quad (3)$$

Where  $E$  represents the energy density (mWh·cm<sup>-2</sup>),  $C_s$  is the areal specific capacitance (F·cm<sup>-2</sup>),  $V$  means the operating voltage (V),  $P$  is the power energy (mW·cm<sup>-2</sup>),  $t$  refers to the discharge time (s).

Also, to achieve  $q_+ = q_-$ , the mass ratio of positive electrode active material to negative electrode active material is determined from the following equation:

$$m_+ : m_- = \left( \int \frac{idV}{v} \right)_- : \left( \int \frac{idV}{v} \right)_+ \quad (4)$$

The mass ratio of the positive electrode active material to the negative electrode active materials was determined from the cyclic voltammetry acquired at 10mV/s for both electrodes.

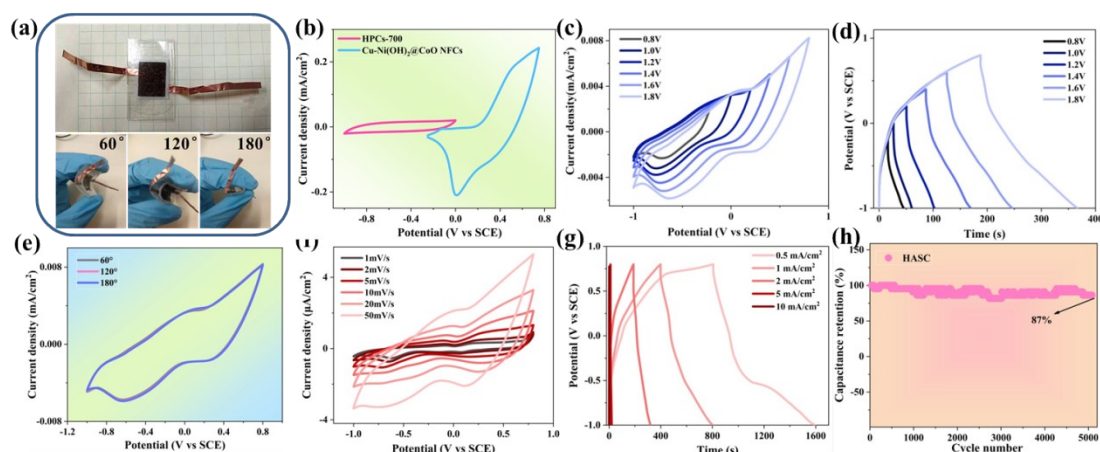

**Figure S1.** (a) The photo of obtained flexible all-solid supercapacitor device with different bend angles; (b) CV curves of Cu-Ni(OH)<sub>2</sub>@CoO NFCs and porous carbon at a scan rate of 100 mV·s<sup>-1</sup> in a three-electrode system; (c) CV plots of Cu-Ni(OH)<sub>2</sub>@CoO NFCs//porous carbon HASC at different potential windows; (d) GCD curves of Cu-Ni(OH)<sub>2</sub>@CoO NFCs//porous carbon HASC at different potential windows from 0.8 to 1.8 V; (e) CV plots of Cu-Ni(OH)<sub>2</sub>@CoO NFCs//porous carbon HASC at different bend angles; (f) CV plots of Cu-Ni(OH)<sub>2</sub>@CoO NFCs//porous carbon HASC at various scan rates; (g) GCD plots of Cu-Ni(OH)<sub>2</sub>@CoO NFCs//porous carbon HASC at various current density; (h) a function of specific capacitance of Cu-Ni(OH)<sub>2</sub>@CoO NFCs//porous carbon HASC to current density.

A flexible solid-state HASC was fabricated to explore the practical application of electrode materials. In the assemble procedure, the as-prepared Cu-Ni(OH)<sub>2</sub>@CoO NFCs, porous carbon from our previous work<sup>1</sup> and PVA/KOH gel were chosen as positive electrode, negative electrode and electrolyte, respectively. The outstanding flexibility of assembled HASC device is displayed in the **Figure. S1a**, and the shape of CV plots at different bend angles (**Figure. S1e**) is nearly unchanged at all. As shown in **Figure. S1b**, the potential windows of Cu-Ni(OH)<sub>2</sub>@CoO NFCs//porous carbon HASC

were determined through the test of voltage range at a scan rate of 100 mV s<sup>-1</sup>. As depicted in **Figure. S1c** and **S1d**, the CV and GCD tests were conducted at different potential windows from 0.8 V to 1.8 V. No obvious polarization could be observed when the potential window was less than 1.8 V (**Figure. S1c**), suggesting that the operating voltage of HASC could be broadened up to 1.8 V. As displayed in **Figure. S1f**, a series of redox peaks appeared at the CV plots in different scan rates, indicating that both pseudo-capacitance and double-layer capacitance take effect in the process of electrode reactions.<sup>2</sup> Furthermore, the CV curves of HASC device nearly remain its initial shape, suggesting a good reversibility.<sup>3</sup> Additionally, based on **Figure. S1g** and **Equation 1**, the mass loading of the positive and negative electrode in the assembled HASC are 0.0022 g and 0.0153 g, and the areal specific capacitances of Cu-Ni(OH)<sub>2</sub>@CoO NFCs//porous carbon HASC can be calculated to be 996.6 mF cm<sup>-2</sup> at current density of 1.0 mA cm<sup>-2</sup>.

Energy density and power density are two important parameters in evaluating supercapacitive performance. The obtained Cu-Ni(OH)<sub>2</sub>@CoO NFCs//porous carbon HASC device exhibits a superior energy density of 0.45 mWh cm<sup>-2</sup> when its power energy up to 9 mW cm<sup>-2</sup>, exceeding most of transition-metal based asymmetric supercapacitors. The comparatively detailed parameters with some recent publications can be found in the *Ragone* plots (**Figure. S9**) and **Table S4**. Furthermore, the values of  $R_s$  and  $R_{ct}$  derived from the EIS measurement in **Figure. S8** are treated as the criterion of evaluating the charge transfer process, which demonstrates a superior electrochemistry property for Cu-Ni(OH)<sub>2</sub>@CoO NFCs//porous carbon HASC.<sup>4</sup> In

addition, the durability of HASC was explored through charge and discharge cycle test at a current density of 1 mA cm<sup>-2</sup>. No abnormal fluctuations are witnessed during testing, and the capacitance still remains *ca.*87% after 5000 cycles (**Figure. S1h**). Besides, the coulombic efficiency of HASC can reach to 92.4%, indicating an excellent reversibility (**Figure. S10**).<sup>5</sup> To sum up, the Cu-Ni(OH)<sub>2</sub>@CoO NFCs//porous carbon flexible solid-state HASC device displays an admirable performance.

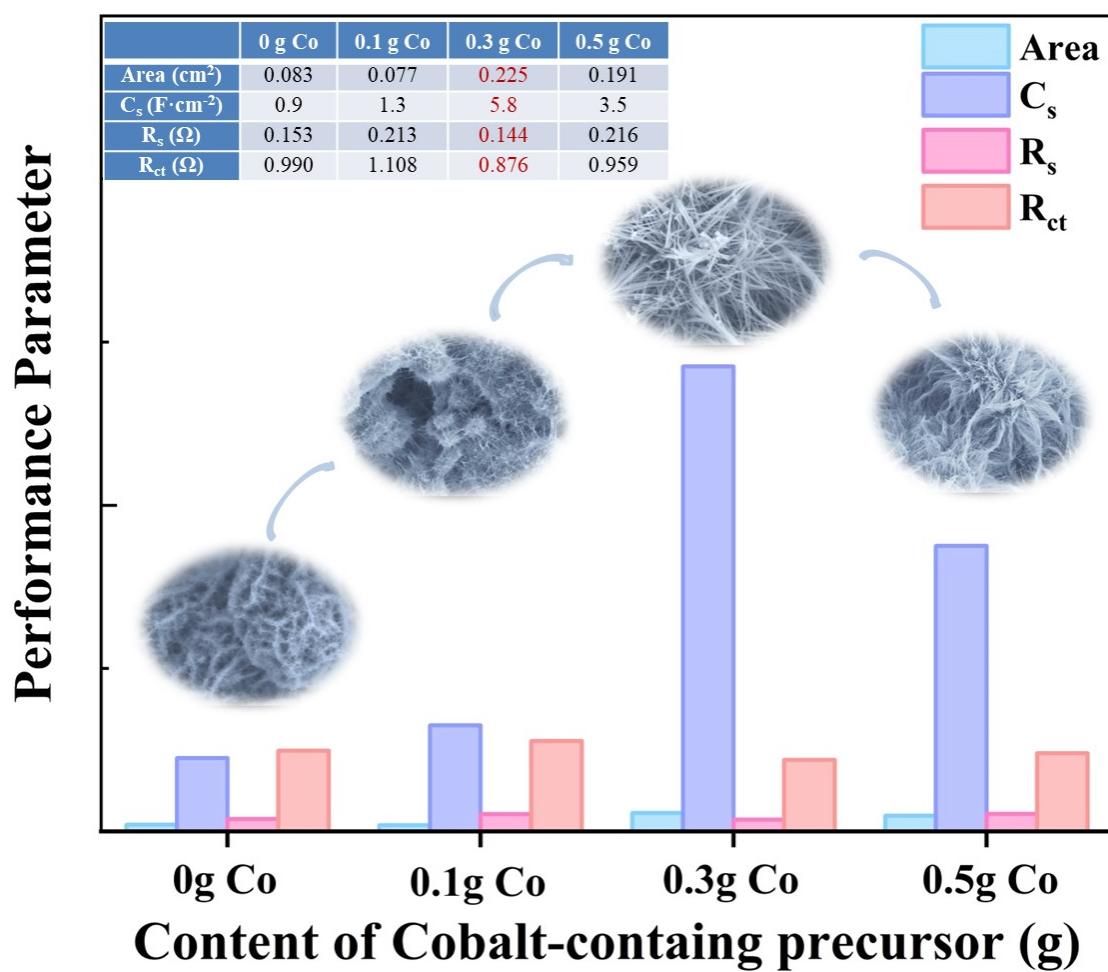

**Figure S2.** Relationship between properties parameters (Area: the area of one CV cycle; C<sub>s</sub>: areal specific capacitance of electrode materials; R<sub>s</sub>: the equivalent series resistance; R<sub>ct</sub>: charge transfer resistance) and content of precursor Co-containing.



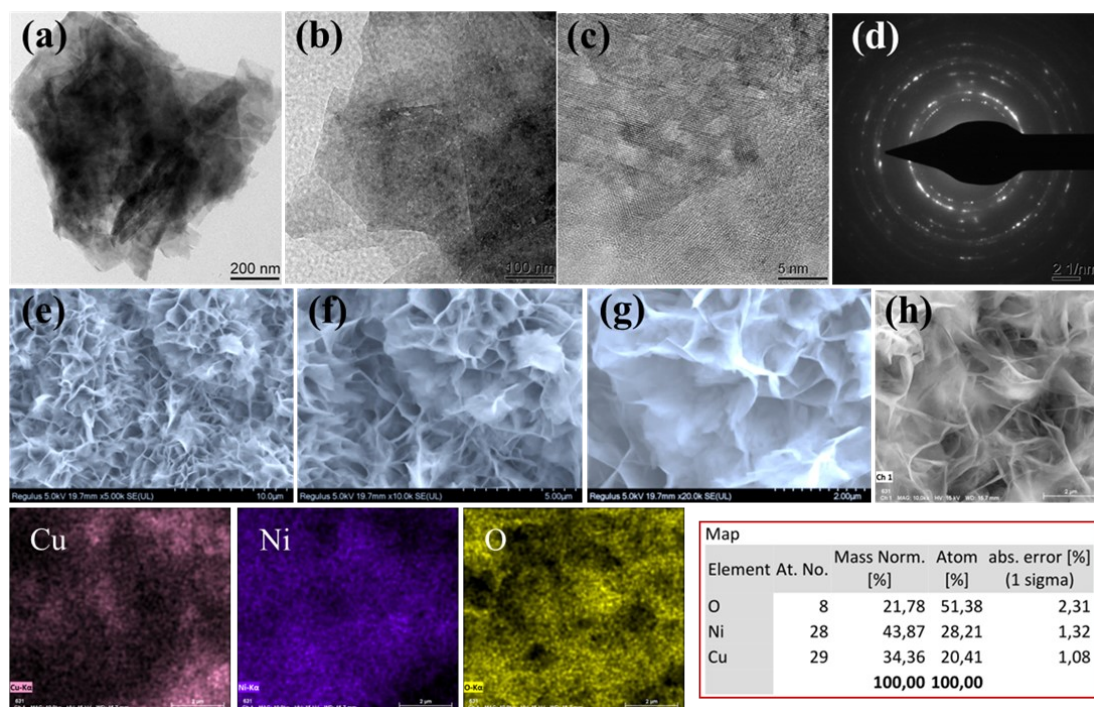

**Figure S3.** TEM images (a-d); SEM images (e-g) and EDS analyses (h) of typical Cu-Ni(OH)<sub>2</sub> NAs active materials with different magnifications and locations of sample.

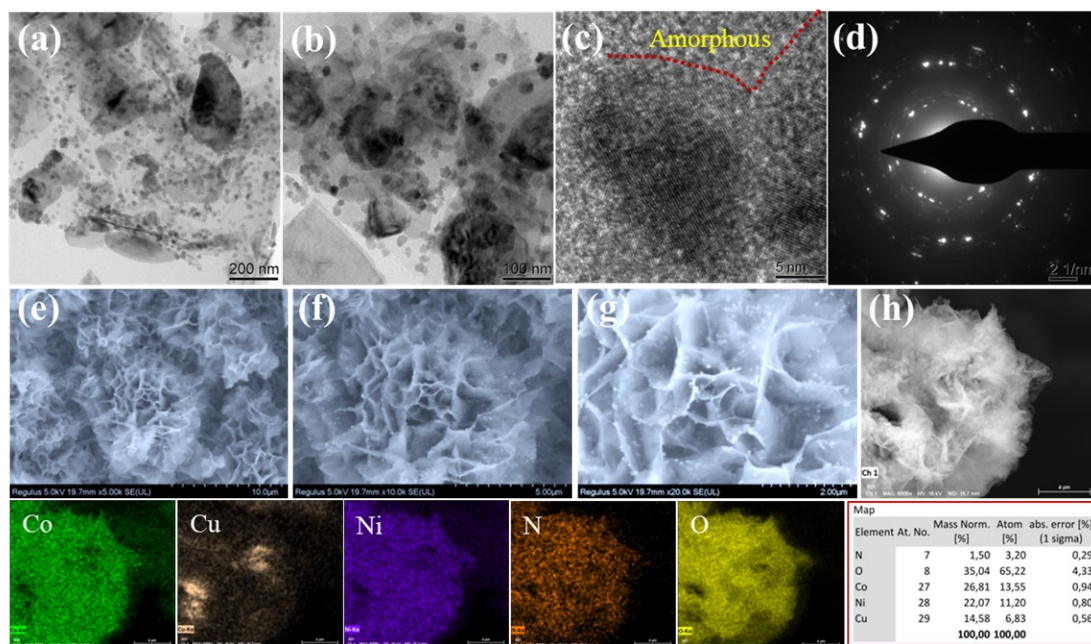

**Figure S4.** TEM images (a-d); SEM images (e-g) and EDS analyses (h) of typical Cu-Ni(OH)<sub>2</sub>@CoO NAs; active materials with different magnifications and locations of sample.

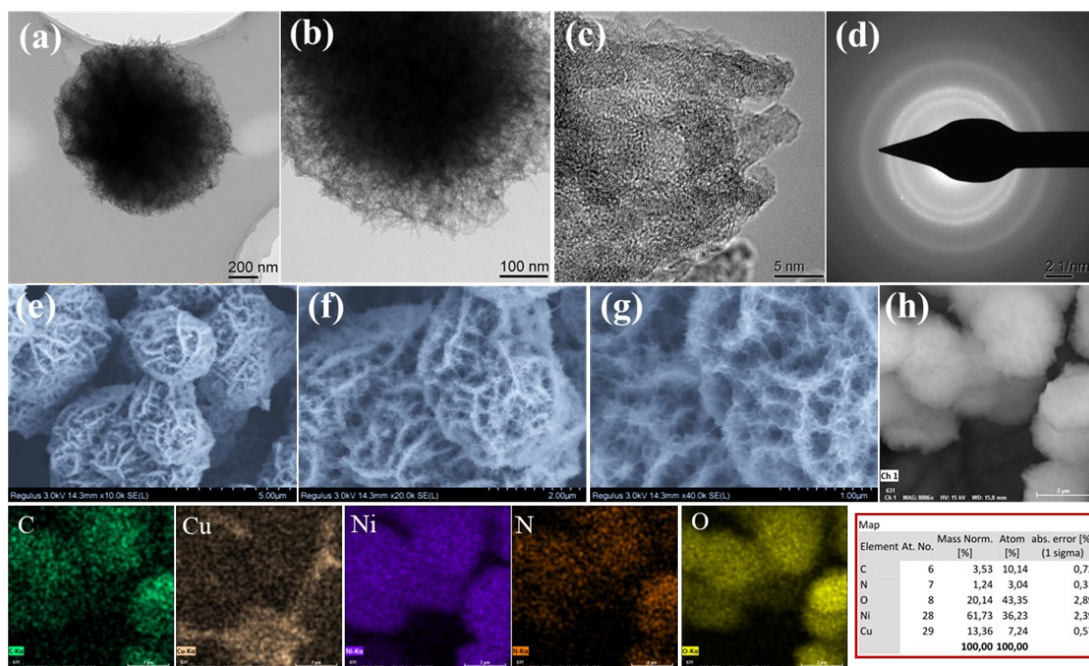

**Figure S5.** TEM images (a-d); SEM images (e-g) and EDS analyses (h) of typical Cu-Ni(OH)<sub>2</sub> NBs active materials with different magnifications and locations of sample.

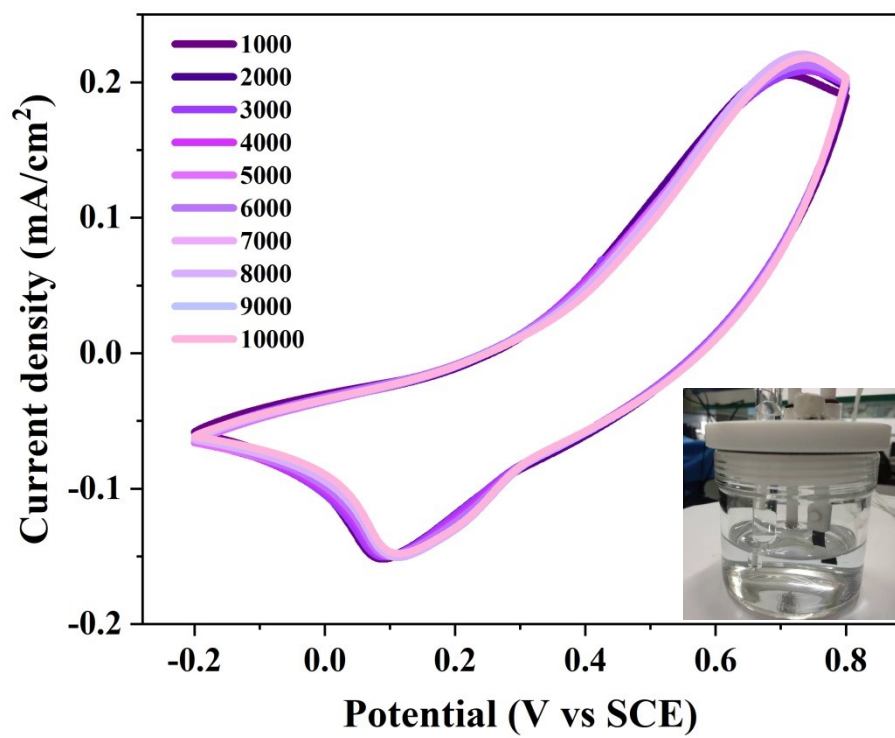

**Figure S6.** Comparison of CV curves at different cycle numbers for Cu-Ni(OH)<sub>2</sub>@CoO NFCs electrode.

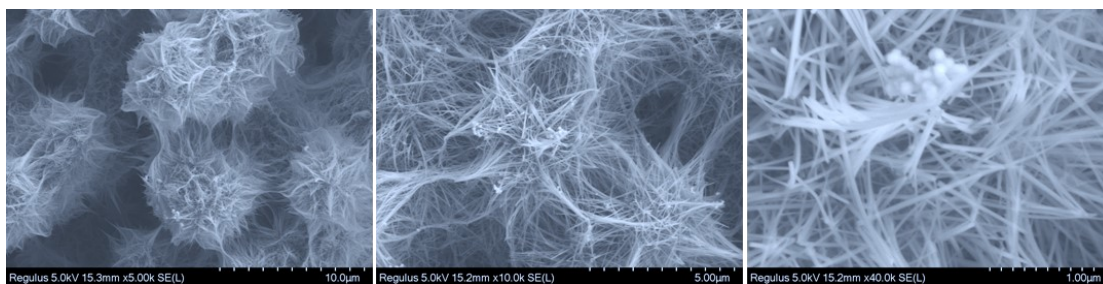

**Figure S7.** SEM images of Cu-Ni(OH)<sub>2</sub>@CoO NFCs after 10000 CV cycles.

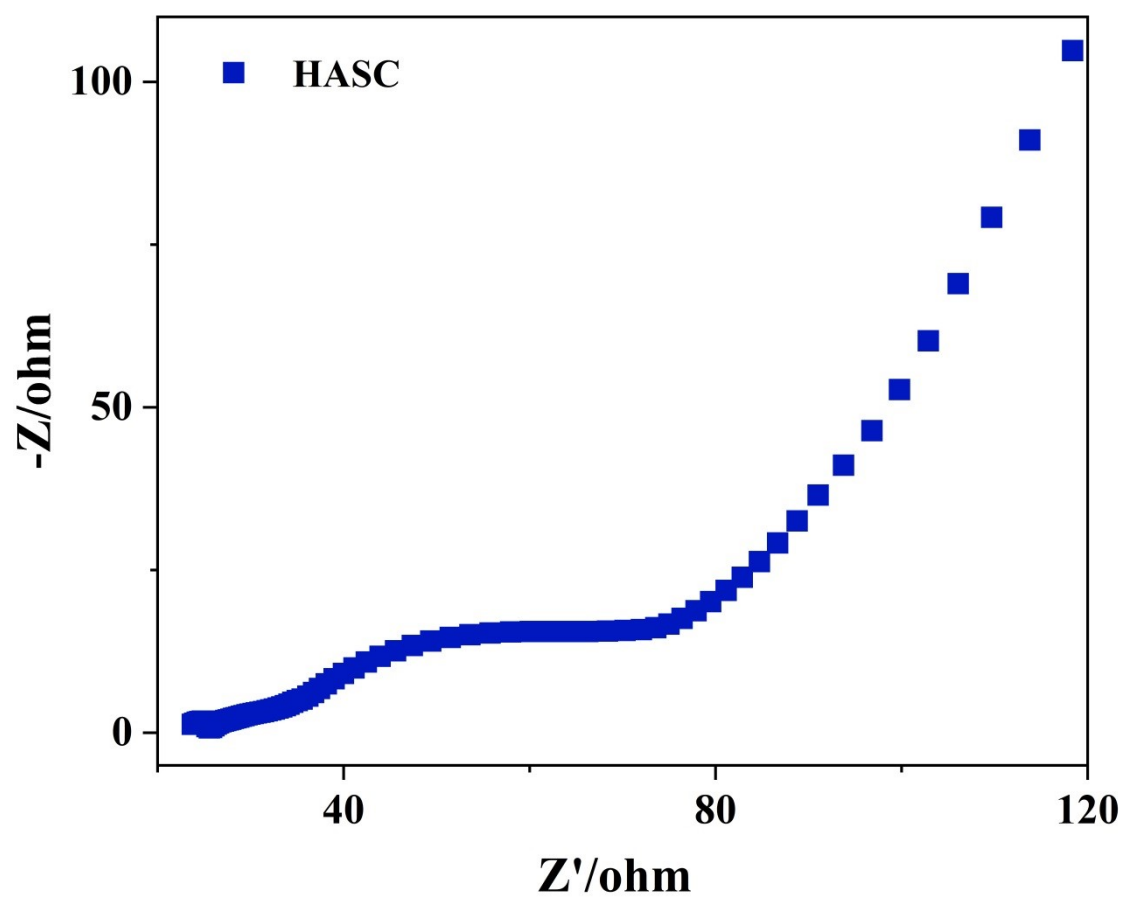

**Figure S8.** Nyquist plots of Cu-Ni(OH)<sub>2</sub>@CoO NFCs//porous carbon HASC.

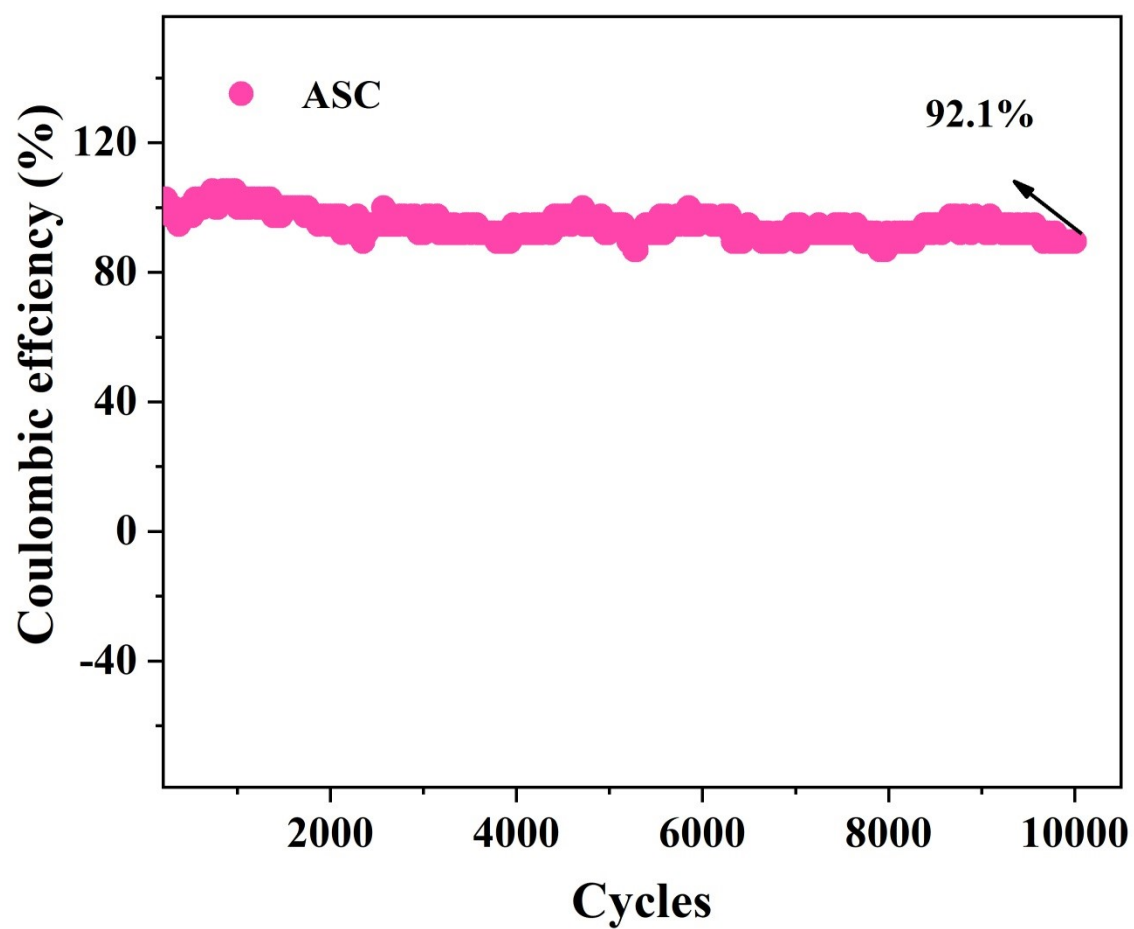

**Figure S9.** Coulomb efficiency of Cu-Ni(OH)<sub>2</sub>@CoO NFCs//porous carbon HASC as a function of cycle number.



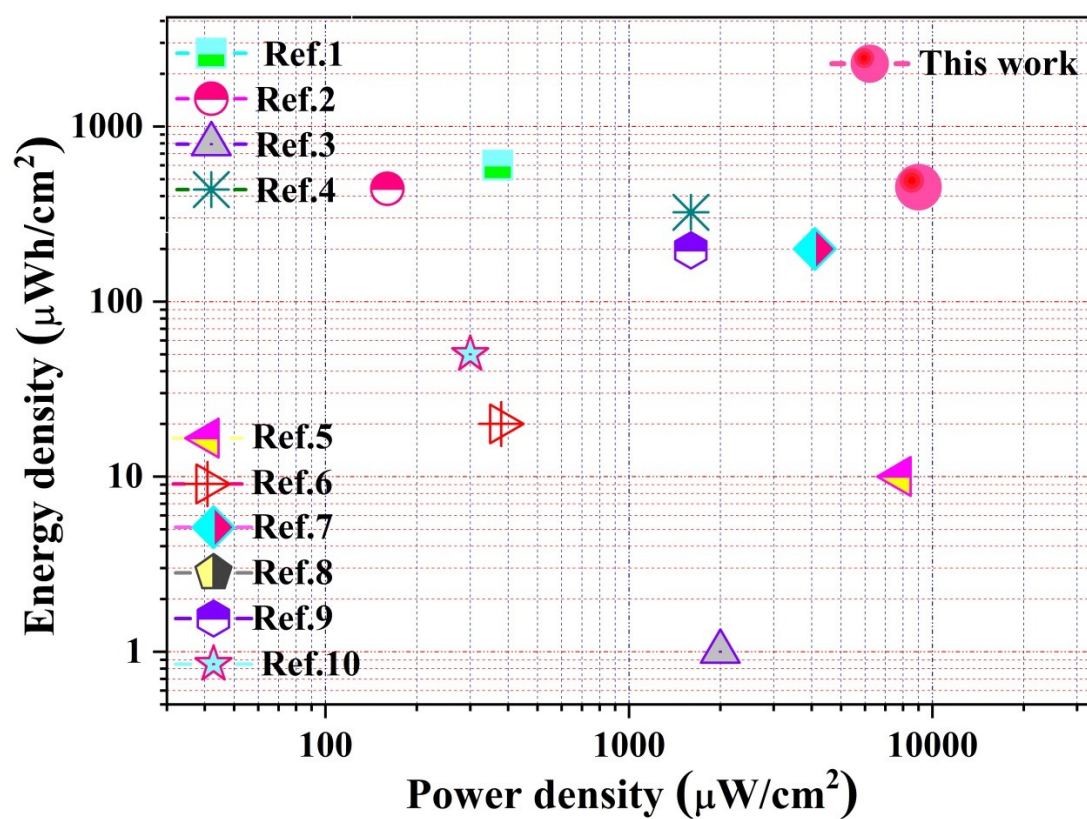

**Figure S10.** Ragone plots showing the comparison of Cu-Ni(OH)<sub>2</sub>@CoO NFCs//porous carbon HASC with other Ni/Co-based devices.



**Table S1.** Comparison of several electrode materials in the terms of conductivity

|                                       | <i>Resistivity (<math>\mu\Omega\cdot\text{m}</math>)</i> | <i>Conductivity (S/m)</i> |
|---------------------------------------|----------------------------------------------------------|---------------------------|
| <b>Cu-Ni(OH)<sub>2</sub> NAs</b>      | 3.98313                                                  | 251059.08401              |
| <b>Cu-Ni(OH)<sub>2</sub>@CoO NAs</b>  | 5.10301                                                  | 195962.92514              |
| <b>Cu-Ni(OH)<sub>2</sub> NBs</b>      | 4.42779                                                  | 225846.52941              |
| <b>Cu-Ni(OH)<sub>2</sub>@CoO NFCs</b> | 3.17578                                                  | 314883.03737              |

**Table S2.** The values of  $R_s$  and  $R_{ct}$  for Cu-Ni(OH)<sub>2</sub> NAs, Cu-Ni(OH)<sub>2</sub>@CoO NAs, Cu-Ni(OH)<sub>2</sub> NBs and Cu-Ni(OH)<sub>2</sub>@CoO NFCs electrodes

|                                                  | <b>Cu-Ni(OH)<sub>2</sub><br/>NAs</b> | <b>Cu-Ni(OH)<sub>2</sub>@CoO<br/>NAs</b> | <b>Cu-Ni(OH)<sub>2</sub> NBs</b> | <b>Cu-Ni(OH)<sub>2</sub>@CoO<br/>NFCs</b> |
|--------------------------------------------------|--------------------------------------|------------------------------------------|----------------------------------|-------------------------------------------|
| <b><math>R_s</math> (<math>\Omega</math>)</b>    | 0.142                                | 0.162                                    | 0.158                            | 0.131                                     |
| <b><math>R_{ct}</math> (<math>\Omega</math>)</b> | 1.132                                | 1.035                                    | 1.125                            | 1.023                                     |

**Table S3.** Comparison of Ni/Co-based materials applied to supercapacitors

| Electrode                              | Electrolyte | Areal specific capacitance | current density       | Reference |
|----------------------------------------|-------------|----------------------------|-----------------------|-----------|
| Ni/Co-oxyhydroxides                    | 6 M KOH     | 8.87 F·cm <sup>-2</sup>    | 5 mA·cm <sup>-2</sup> | [6]       |
| CoO@Ni(OH) <sub>2</sub><br>core-shell  | 2 M KOH     | 1418.2 F·g <sup>-1</sup>   | 1 A·g <sup>-1</sup>   | [7]       |
| Ni(OH) <sub>2</sub> /CoO/rGO           | 3 M KOH     | 1056 F·g <sup>-1</sup>     | 5 mV·s <sup>-1</sup>  | [8]       |
| VCO/CNFs                               | 1 M KOH     | 1.83 F·cm <sup>-2</sup>    | 8 mA·cm <sup>-2</sup> | [9]       |
| CoO@CoS/Ni <sub>3</sub> S <sub>2</sub> | 2 M KOH     | 2506 F·g <sup>-1</sup>     | 1 A·g <sup>-1</sup>   | [10]      |
| CoO-GHBs/CC                            | 5 M KOH     | 2238 F·g <sup>-1</sup>     | 1 A·g <sup>-1</sup>   | [11]      |
| CoO/NiO-Cu@CuO                         | 6 M KOH     | 2.03 F·cm <sup>-2</sup>    | 2 mA·cm <sup>-2</sup> | [12]      |
| CoO/Co-Cu-S                            | 2 M KOH     | 2300 F·g <sup>-1</sup>     | 2 A·g <sup>-1</sup>   | [13]      |
| CuCoO-H                                | 3 M KOH     | 405.36 F·g <sup>-1</sup>   | 20 A·g <sup>-1</sup>  | [14]      |
| Cu-Ni(OH) <sub>2</sub> @CoO<br>NFCs    | 3 M KOH     | 5.8 F·cm <sup>-2</sup>     | 1 mA·cm <sup>-2</sup> | This work |

**Table S4.** Comparison of Ni/Co-based materials assembled to HASC in the field of supercapacitors

| HASC                                                                                               | C <sub>s</sub><br>(mF cm <sup>-2</sup> ) | E<br>(mWh cm <sup>-2</sup> ) | P<br>(mW cm <sup>-2</sup> ) | Reference |
|----------------------------------------------------------------------------------------------------|------------------------------------------|------------------------------|-----------------------------|-----------|
| Ni@Ni(OH) <sub>2</sub> /ACC                                                                        | 1910                                     | 0.6                          | 0.37                        | [15]      |
| Ni <sub>2</sub> CoS <sub>4</sub> @NiCo <sub>2</sub> O <sub>4</sub> /CFP                            | 1250                                     | 0.44                         | 0.16                        | [16]      |
| NiCo <sub>2</sub> O <sub>4</sub> NG @ CF                                                           | 25                                       | 0.001                        | 2                           | [17]      |
| PNH@NeC LDH//AC                                                                                    | 21                                       | 0.323                        | 1.6                         | [18]      |
| NiO/Ni(OH) <sub>2</sub> /<br>PEDOT//AC                                                             | 404                                      | 0.01                         | 7.8                         | [19]      |
| NiO@MnCo-LDH//Ni/AC                                                                                | 368                                      | 0.02                         | 0.38                        | [20]      |
| 3D-<br>NiMoO <sub>4</sub> /Ni@CW//rGO/C<br>F                                                       | 504                                      | 0.2                          | 4.1                         | [21]      |
| Co(OH) <sub>2</sub> @Ni/Ag-mesh                                                                    | 248                                      | 0.00042                      | 0.00833                     | [22]      |
| blanket-like<br>Co(OH) <sub>2</sub> /CoOOH/Co <sub>3</sub> O <sub>4</sub> /<br>Cu(OH) <sub>2</sub> | 888                                      | 0.196                        | 1.6                         | [23]      |
| NiO// $\alpha$ -Fe <sub>2</sub> O <sub>3</sub>                                                     | 229                                      | 0.05                         | 0.3                         | [24]      |
| Cu-Ni(OH) <sub>2</sub> @CoO<br>NFCs//Porous carbon                                                 | 996.6                                    | 0.45                         | 9.0                         | This work |

## References

- (1) Fan, P.; Ren, J.; Pang, K.; Cheng, Y.; Wu, X.; Zhang, Z.; Ren, J.; Huang, W.; Song, R., Cellulose-Solvent-Assisted, One-Step Pyrolysis to Fabricate Heteroatoms-Doped Porous Carbons for Electrode Materials of Supercapacitors. *ACS Sustainable Chemistry & Engineering* **2018**, 6 (6), 7715-7724.
- (2) Zardkhoshoui, A. M.; Davarani, S. S. H., Construction of complex copper-cobalt selenide hollow structures as an attractive battery-type electrode material for hybrid supercapacitors. *Chemical Engineering Journal* **2020**, 402, 126241.
- (3) Fu, M.; Lv, R.; Lei, Y.; Terrones, M., Ultralight Flexible Electrodes of Nitrogen-Doped Carbon Macrotube Sponges for High-Performance Supercapacitors. *Small* **2021**, 17 (1), e2004827.
- (4) Chen, F.; Chen, C.; Hu, Q.; Xiang, B.; Song, T.; Zou, X.; Li, W.; Xiong, B.; Deng, M., Synthesis of CuO@CoNi LDH on Cu foam for high-performance supercapacitors. *Chemical Engineering Journal* **2020**, 401, 126145.
- (5) Wang, Y.; Wang, X.; Li, X.; Li, X.; Liu, Y.; Bai, Y.; Xiao, H.; Yuan, G., A High-Performance, Tailorable, Wearable, and Foldable Solid-State Supercapacitor Enabled by Arranging Pseudocapacitive Groups and MXene Flakes on Textile Electrode Surface. *Advanced Functional Materials* **2020**, 31 (7), 2008185.
- (6) Pan, M.; Zeng, W.; Quan, H.; Cui, J.; Guo, Y.; Wang, Y.; Chen, D., Low-crystalline Ni/Co-oxyhydroxides nanoarrays on carbon cloth with high mass loading and hierarchical structure as cathode for supercapacitors. *Electrochimica Acta* **2020**, 357, 136886.
- (7) Wu, W.; Xia, P.; Xuan, Y.; Yang, R.; Chen, M.; Jiang, D., Hierarchical CoO@Ni(OH)<sub>2</sub> core-shell heterostructure arrays for advanced asymmetric supercapacitors. *Nanotechnology* **2020**, 31 (40), 405705.
- (8) Jiang, L.; Zou, R.; Li, W.; Sun, J.; Hu, X.; Xue, Y.; He, G.; Hu, J., Ni(OH)<sub>2</sub>/CoO/reduced graphene oxide composites with excellent electrochemical properties. *J. Mater. Chem. A* **2013**, 1 (3), 478-481.
- (9) Nie, G.; Zhao, X.; Jiang, J.; Luan, Y.; Shi, J.; Liu, J.; Kou, Z.; Wang, J.; Long, Y.-Z., Flexible supercapacitor of high areal performance with vanadium/cobalt oxides on carbon nanofibers as a binder-free membrane electrode. *Chemical Engineering Journal* **2020**, 402, 126294.
- (10) Zhang, Y.; Wang, D.; Lü, S.; Chen, Y.; Fan, H.; Wei, M.; Yang, L.; Yu, W. W.; Meng, X., CoO@CoS/Ni<sub>3</sub>S<sub>2</sub> hierarchical nanostructure arrays for high performance asymmetric supercapacitor. *Applied Surface Science* **2020**, 532, 147438.
- (11) Tseng, C. A.; Sahoo, P. K.; Lee, C. P.; Lin, Y. T.; Xu, J. H.; Chen, Y. T., Synthesis of CoO-Decorated Graphene Hollow Nanoballs for High-Performance Flexible Supercapacitors. *ACS Appl Mater Interfaces* **2020**, 12 (36), 40426-40432.
- (12) Zhang, A.; Yue, L.; Jia, D.; Cui, L.; Wei, D.; Huang, W.; Liu, R.; Liu, Y.; Yang, W.; Liu, J., Cobalt/Nickel Ions-Assisted Synthesis of Laminated CuO Nanospheres Based on Cu(OH)<sub>2</sub> Nanorod Arrays for High-Performance Supercapacitors. *ACS Appl*

*Mater Interfaces* **2020**, 12 (2), 2591-2600.

(13) Lu, W.; Shen, J.; Zhang, P.; Zhong, Y.; Hu, Y.; Lou, X. W. D., Construction of CoO/Co-Cu-S Hierarchical Tubular Heterostructures for Hybrid Supercapacitors. *Angew Chem Int Ed Engl* **2019**, 58 (43), 15441-15447.

(14) Jin, C.; Cui, Y.; Zhang, G.; Luo, W.; Liu, Y.; Sun, Y.; Tian, Z.; Zheng, W., Synthesis of copper-cobalt hybrid oxide microflowers as electrode material for supercapacitors. *Chemical Engineering Journal* **2018**, 343, 331-339.

(15) Jin, Z.; Zhou, M.; Hu, J.; Li, K.; Tang, L.; Zhao, H.; Cai, Z.; Zhao, Y. J., Hierarchical Ni@Ni(OH)<sub>2</sub> core-shell hybrid arrays on cotton cloth fabricated by a top-down approach for high-performance flexible asymmetric supercapacitors. *Alloys Compd.* **2019**, 784, 1091-1098.

(16) Cao, L.; Tang, G.; Mei, J.; Liu, H., Construct hierarchical electrode with Ni<sub>x</sub>Co<sub>3-x</sub>S<sub>4</sub> nanosheet coated on NiCo<sub>2</sub>O<sub>4</sub> nanowire arrays grown on carbon fiber paper for high-performance asymmetric supercapacitors. *J. Power Sources*. **2017**, 359, 262-269.

(17) Senthilkumar, S. T.; Fu, N.; Liu, Y.; Wang, Y.; Zhou, L.; Huang, H., Flexible fiber hybrid supercapacitor with NiCo<sub>2</sub>O<sub>4</sub> nanograss@carbon fiber and bio-waste derived high surface area porous carbon. *Electrochim. Acta*. **2016**, 211, 411-419.

(18) Li, K.; Liu, M.; Li, S.; Huang, F.; Wang, L.; Zhang, H., Design on hierarchical P doped Ni(OH)<sub>2</sub>@Ni-Co LDH core-shell heterojunction as an advanced battery-like electrode for high performance hybrid supercapacitors. *Journal of Alloys and Compounds* **2020**, 817, 152712.

(19) Yang, H.; Xu, H.; Li, M.; Zhang, L.; Huang, Y.; Hu, X., Assembly of NiO/Ni(OH)<sub>2</sub>/PEDOT Nanocomposites on Contra Wires for Fiber-Shaped Flexible Asymmetric Supercapacitors. *ACS Appl. Mater. Interfaces.*, **2016**, 8, 1774-1779.

(20) Gao, L.; Fan, R.; Xiao, R.; Cao, K.; Li, P.; Wang, W.; Lu, Y., NiO-bridged MnCo-hydroxides for flexible high-performance fiber-shaped energy storage device. *Appl. Surf. Sci.* **2019**, 475, 1058-1064.

(21) Naderi, L.; Shahrokhian, S., Nickel molybdate nanorods supported on three-dimensional, porous nickel film coated on copper wire as an advanced binder-free electrode for flexible wire-type asymmetric micro-supercapacitors with enhanced electrochemical performances. *J. Colloid Interface Sci.*, **2019**, 542, 325-338.

(22) Soram, B. S.; Dai, J.; Kshetri, T.; Kim, N. H.; Lee, J. H., Vertically grown and intertwined Co(OH)<sub>2</sub> nanosheet@Ni-mesh network for transparent flexible supercapacitor. *Chemical Engineering Journal* **2020**, 391, 123540.

(23) Yu, Y.; Wang, H.; Zhang, H.; Tan, Y.; Wang, Y.; Song, K.; Yang, B.; Yuan, L.; Shen, X.; Hu, X., Blanket-like Co(OH)<sub>2</sub>/CoOOH/Co<sub>3</sub>O<sub>4</sub>/Cu(OH)<sub>2</sub> composites on Cu foam for hybrid supercapacitor. *Electrochimica Acta* **2020**, 334, 135559.

(24) Zhang, S.; Yin, B.; Wang, Z.; Peter, F., Super long-life all solid-state asymmetric supercapacitor based on NiO nanosheets and alpha-Fe<sub>2</sub>O<sub>3</sub> nanorods. *Chem. Eng. J.*, **2016**, 306, 193-203.
